**S3 Table. Pairwise correlations between trust in different groups**

|            |               |                  |                |                |                   |               |                |                |
|------------|---------------|------------------|----------------|----------------|-------------------|---------------|----------------|----------------|
|            | <u>Family</u> |                  |                |                |                   |               |                |                |
| Neighbors  | 0.563         | <u>Neighbors</u> |                |                |                   |               |                |                |
| Juniors    | 0.418         | 0.606            | <u>Juniors</u> |                |                   |               |                |                |
| Seniors    | 0.484         | 0.549            | 0.486          | <u>Seniors</u> |                   |               |                |                |
| Government | 0.342         | 0.410            | 0.365          | 0.347          | <u>Government</u> |               |                |                |
| Police     | 0.470         | 0.506            | 0.409          | 0.439          | 0.599             | <u>Police</u> |                |                |
| Doctors    | 0.622         | 0.487            | 0.388          | 0.485          | 0.436             | 0.609         | <u>Doctors</u> |                |
| Science    | 0.556         | 0.452            | 0.373          | 0.465          | 0.431             | 0.551         | 0.770          | <u>Science</u> |
| WHO        | 0.431         | 0.370            | 0.356          | 0.401          | 0.451             | 0.482         | 0.604          | 0.669          |

All pairwise correlations significant at the 1% level
