**S10 Table. Trust in Government and Science (High) interaction by different levels of expectations and compliance likelihood (SD)**

|                      | (1)<br>High-High   | (2)<br>High-Low    | (3)<br>Low-High    | (4)<br>Low-Low     |
|----------------------|--------------------|--------------------|--------------------|--------------------|
| Trust in Gov (H)     | 0.292<br>(0.295)   | 0.488<br>(0.344)   | 0.600<br>(0.348)   | 0.308<br>(0.387)   |
| Trust in Science (H) | 1.140**<br>(0.160) | 0.385*<br>(0.182)  | 0.500**<br>(0.190) | 0.205<br>(0.213)   |
| H*H                  | -0.114<br>(0.308)  | -0.140<br>(0.361)  | -0.195<br>(0.366)  | 0.0488<br>(0.404)  |
| Constant             | 3.518**<br>(0.346) | 5.021**<br>(0.389) | 5.982**<br>(0.409) | 6.336**<br>(0.445) |
| Individual controls  | Yes                | Yes                | Yes                | Yes                |
| Country controls     | Yes                | Yes                | Yes                | Yes                |
| Observations         | 2,749              | 2,750              | 2,741              | 2,746              |
| R-squared            | 0.117              | 0.030              | 0.053              | 0.025              |

Standard errors in parentheses, \*\* p<0.01, \* p<0.05. OLS estimates with individual (gender, age, education and location) and country controls. High-High refers to both normative and empirical expectations being high; High-Low refers to High normative expectations and Low empirical expectations; Low-High refers to Low normative expectations and high empirical expectations; and Low-Low refers to both normative and empirical expectations being low.
